# Supplementary material
Source: PubMed Central journal article supplement (PMC3416423)

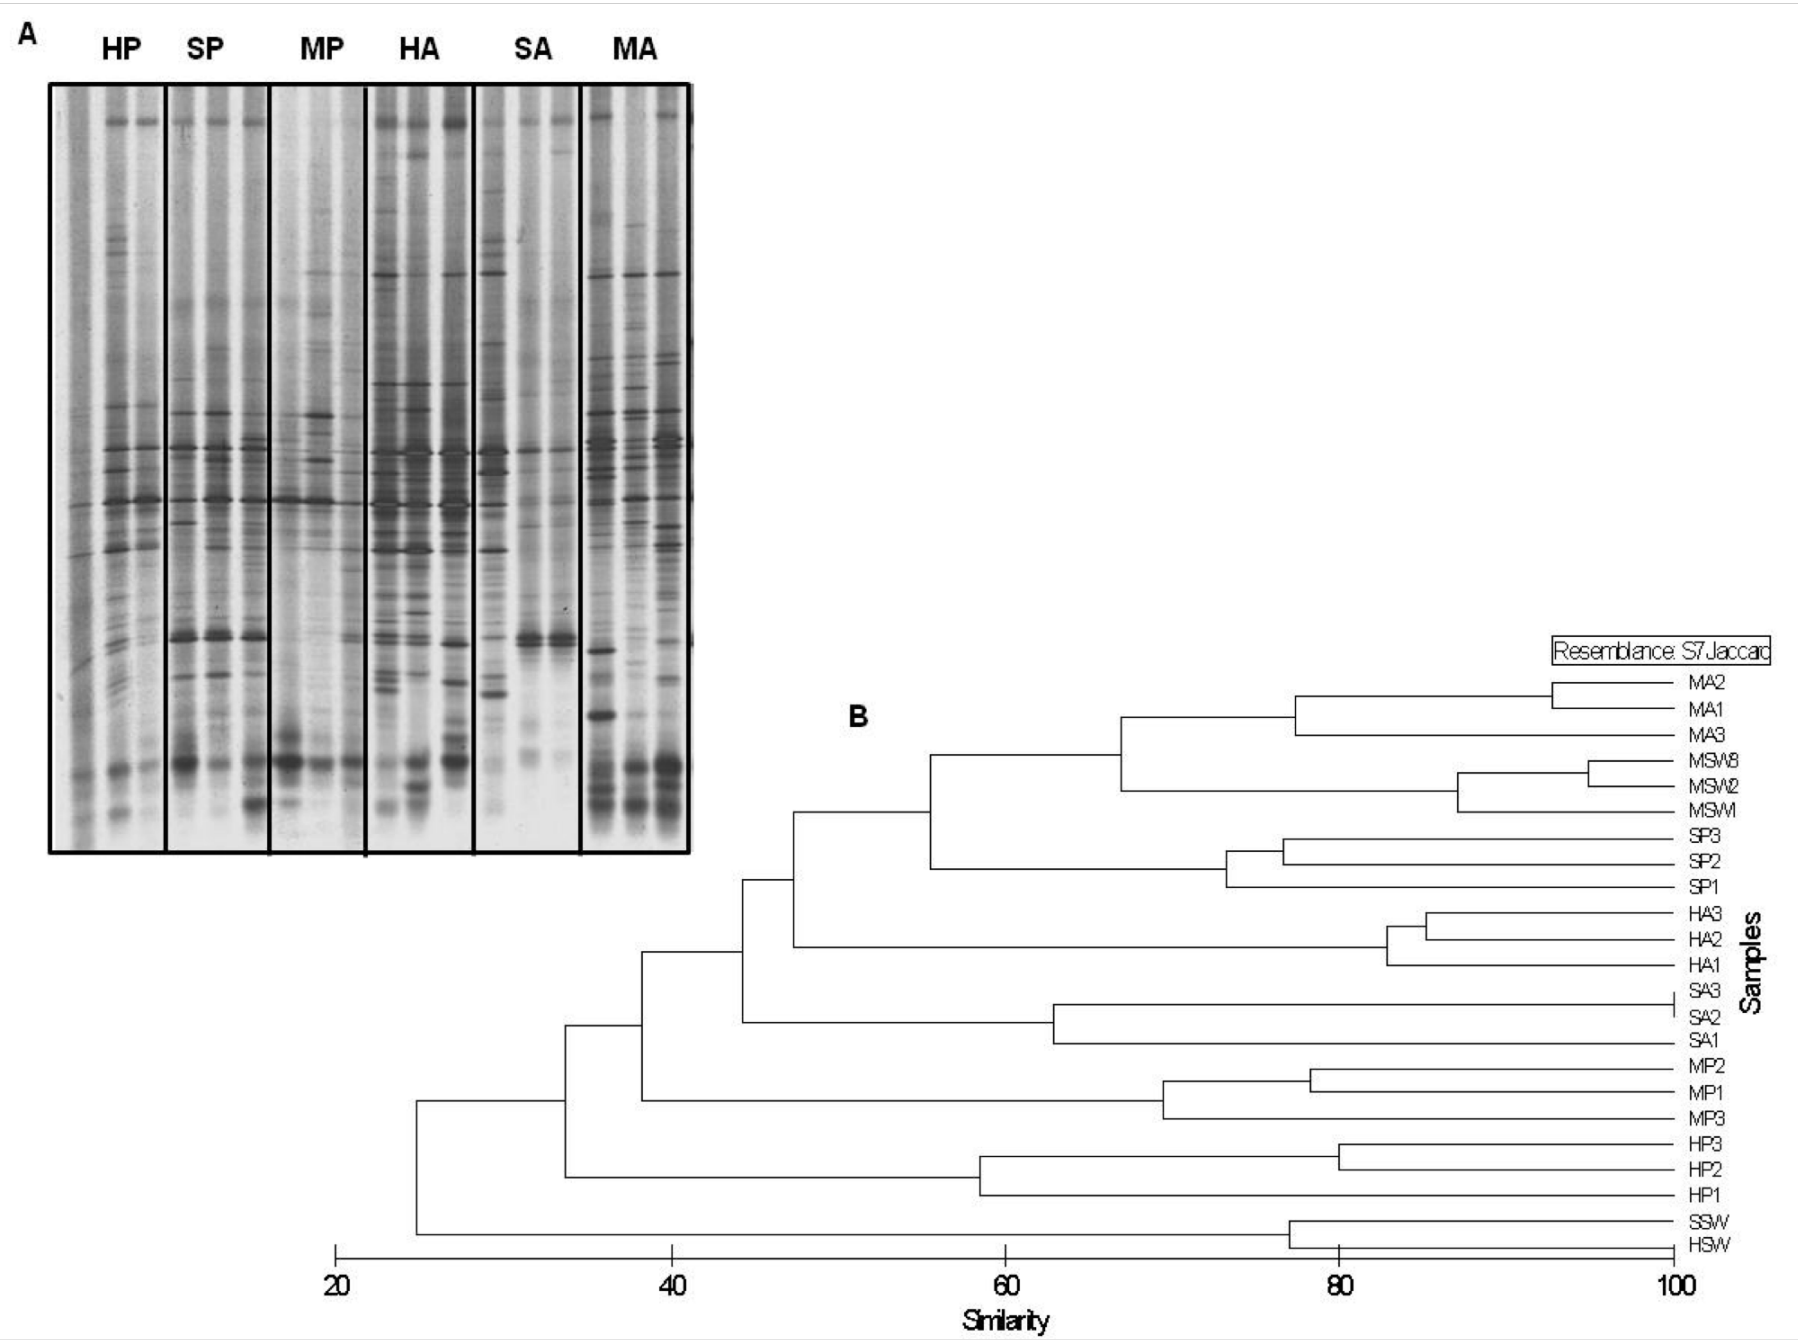

Supplementary Fig. S1.

Supplement: AEM.07764-11_zam999103490so1.pdf [file AEM.07764-11_zam999103490so1.pdf]
